# Supplementary material for: In Vitro 31P MR Chemical Shifts of In Vivo-Detectable Metabolites at 3T as a Basis Set for a Pilot Evaluation of Skeletal Muscle and Liver 31P Spectra with LCModel Software
Source: MDPI journal article supplement (doi:10.3390/molecules26247571), 2021-12-14

## Supplementary Materials: spectra and chemical structures of measured metabolites

$^{31}\text{P}$  MR spectra of all described metabolites in phantom solution measured at 3T. The measurement temperature was  $37^\circ\text{C}$  and the pH from 7.0 to 7.5. Details are given in the methods in the text. The phosphocreatine (PCr) signal was used as standard with a chemical shift of 0 ppm. Spectra were measured without (red lines) and with  $^1\text{H}$  decoupling (blue lines).

**Pi**, inorganic phosphate

**PCr**, Phosphocreatine

*N*-Methyl-*N*-(phosphonocarbamimidoyl)glycine

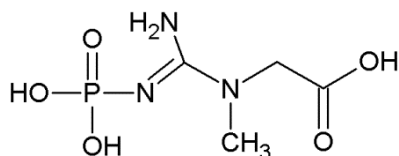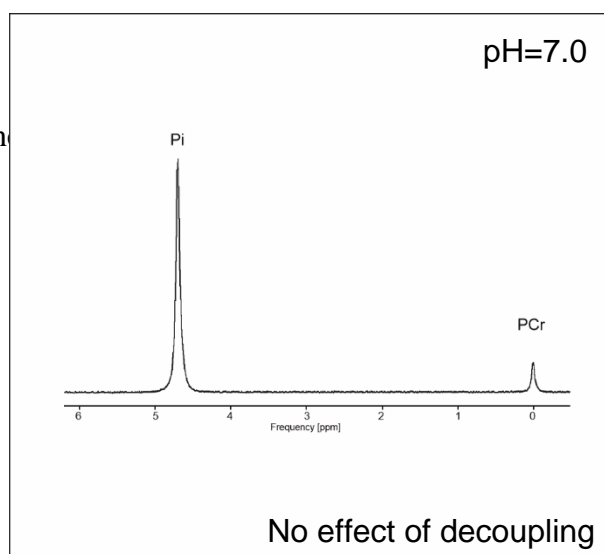

**NAD<sup>+</sup>, NADH**

Nicotinamide adenine dinucleotide

Diphosphopyridine nucleotide (DPN<sup>+</sup>),

Coenzyme I

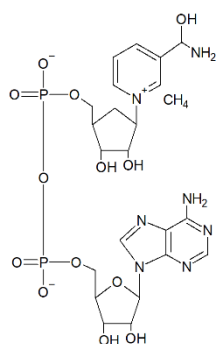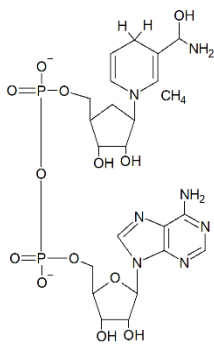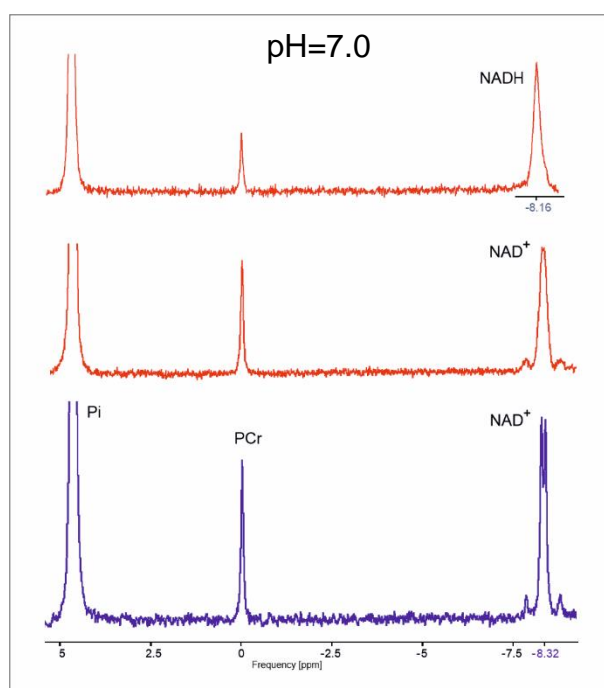

**PEP**, Phosphoenolpyruvate  
2-(Phosphonooxy)prop-2enoic acid

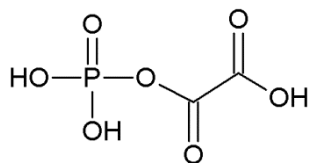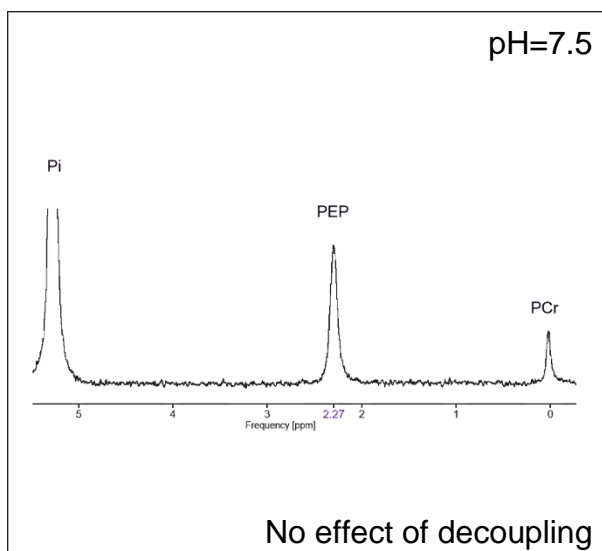

**UDPG**, Uridine diphosphate glucose  
O1-{[(2R,3S,4R,5R)-5-(2,4-Dioxo-3,4-dihydropyrimidin-1(2H)-yl)-3,4-dihydroxyoxolan-2-yl)methyl} O3-[(2R,3R,4S,5S,6R)-3,4,5-trihydroxy-6-(hydroxymethyl)oxan-2-yl] dihydrogen diphosphate

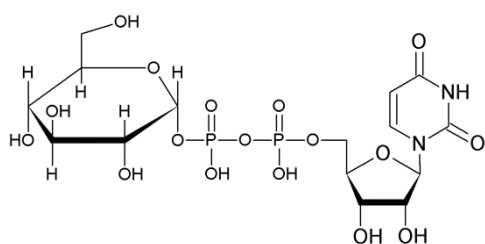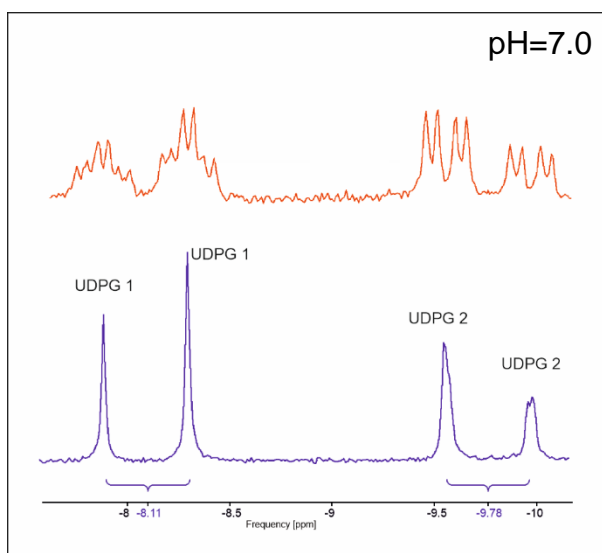

**G1P**, Glucose 1-phosphate  
(2R,3R,4S,5S,6R)-3,4,5-Trihydroxy-6-(hydroxymethyl)oxan-2-yl phosphate

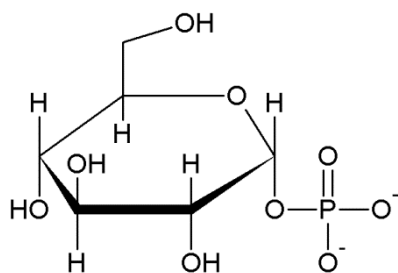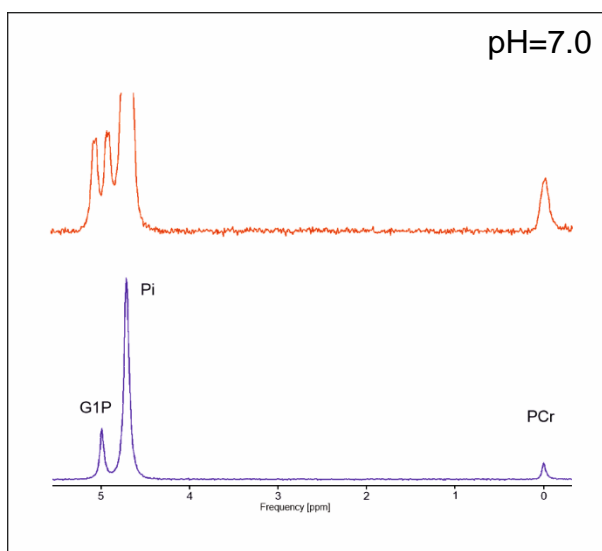

## G6P, Glucose 6-phosphate

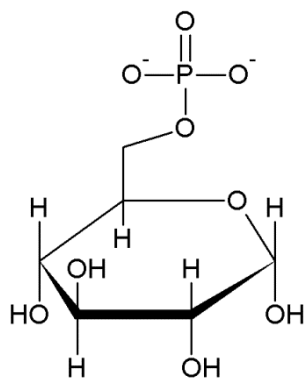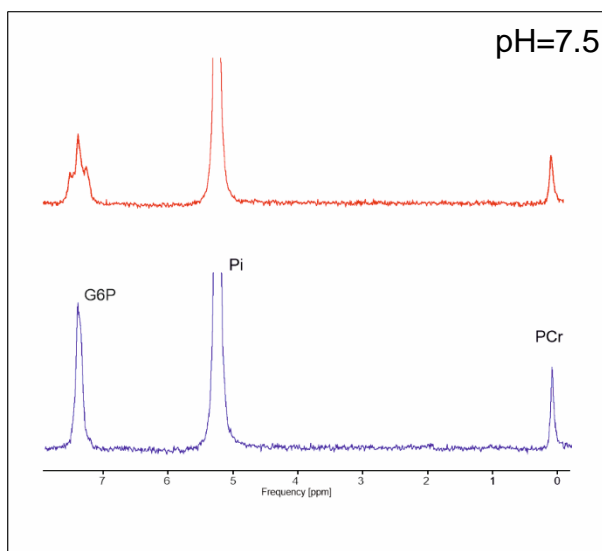

## PC Phosphocholine Choline phosphate

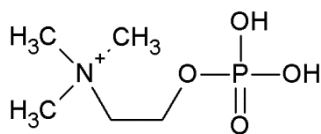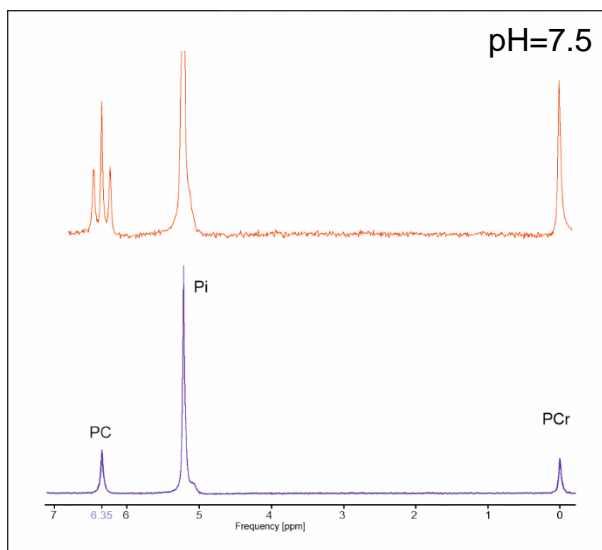

## PE Phosphorylethanolamine Phosphoethanolamine 2-Aminoethyl dihydrogen phosphate

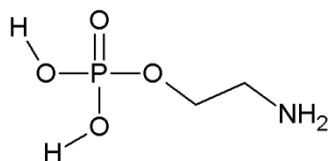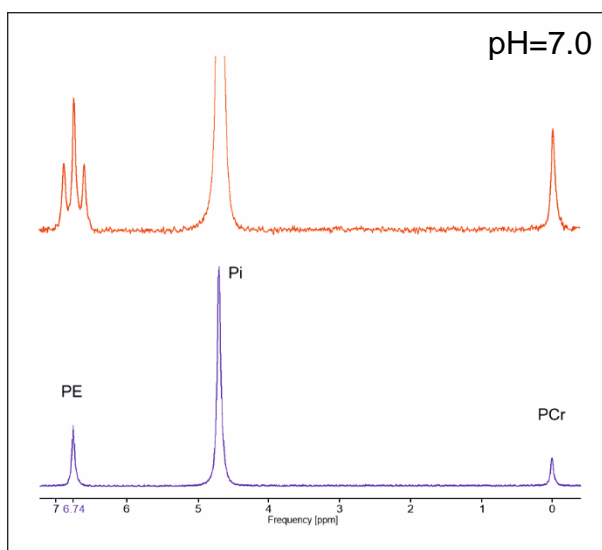

## GPC

Glycerol-3-phosphoryl choline

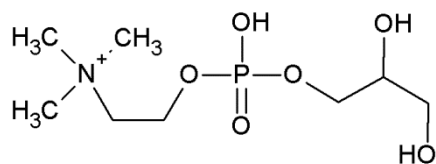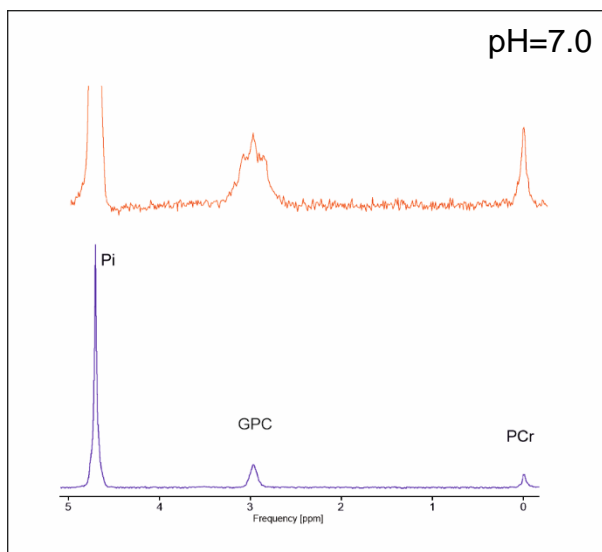

## ATP, Adenosine triphosphate

Adenosine 5'-(tetrahydrogen triphosphate)

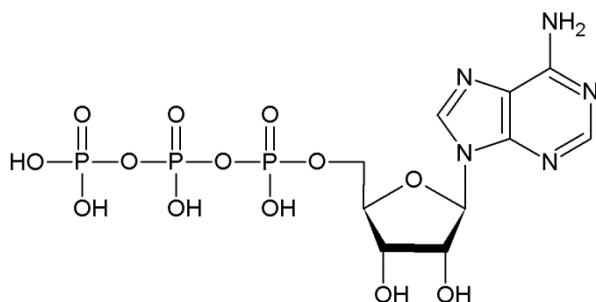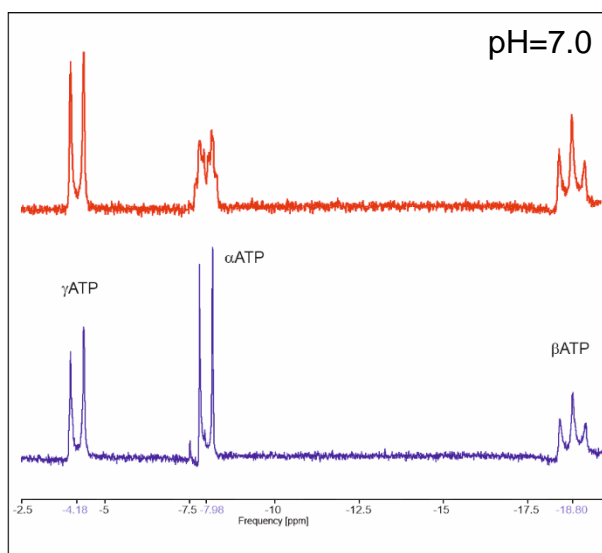

## ADP, Adenosine diphosphate

Adenosine 5'-(trihydrogen diphosphate)

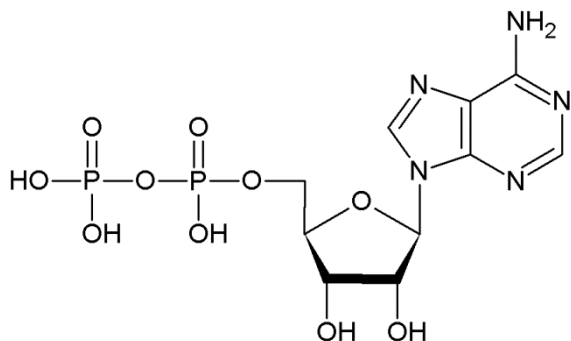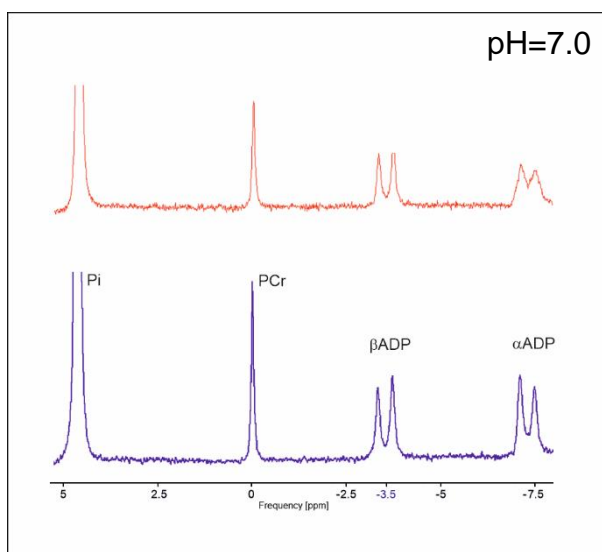

**2,3-DPG, 2,3-diphosphoglycerate)**  
 2,3-Bis(phosphonoxy)propanoic acid

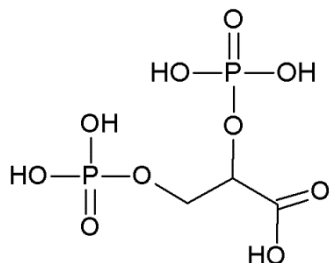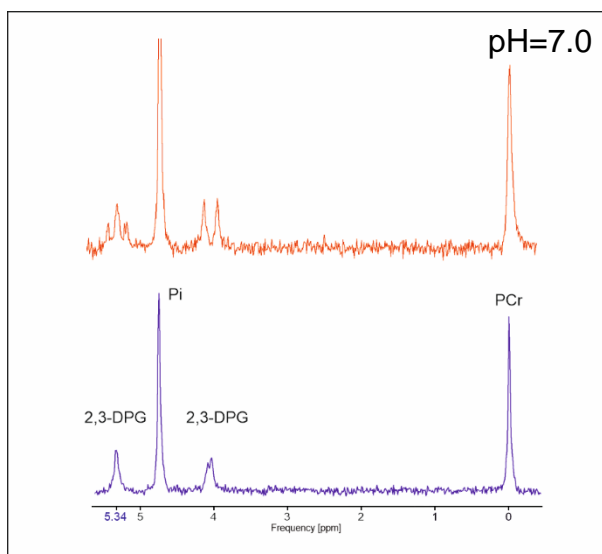

**PtdC, Phosphatidylcholines**  
 1-Oleoyl-2-palmitoyl-phosphatidylcholine  
 (solution of water+ethanol+tritone)  
 \*impurities

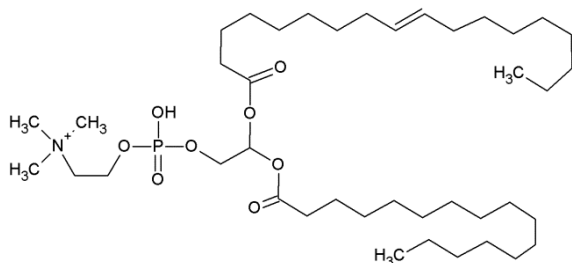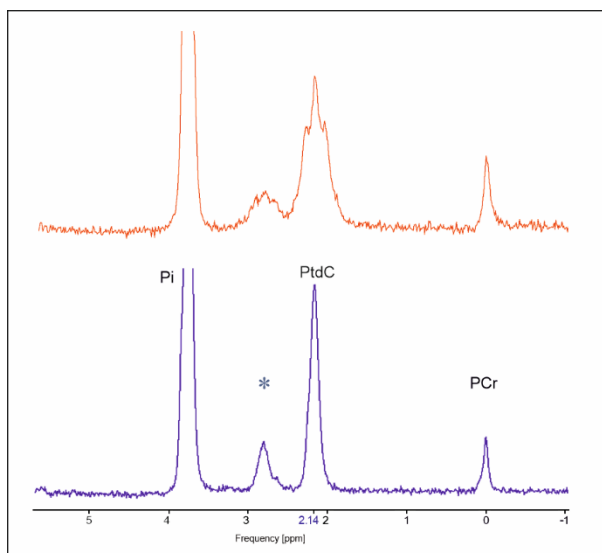

Supplement: s1 [file s1]
